# Supplementary material for: Comparative analysis of three platforms for serum NfL quantification in healthy controls and MS patients
Source: publisher site journal article supplement (doi:10.1515/cclm-2025-1476), 2025-12-17
Supplement: Supplementary file 1 [file j_cclm-2025-1476_suppl_001.docx]

**Supplementary Table 1:** Samples identified as strongly discrepant (outliers) and excluded from analysis

| Nr | Cohort | NF-Light Adv V2 (Plus) | Lumipulse G NfL* | Elecsys NfL* |
| --- | --- | --- | --- | --- |
| 1 | MS | 6.79 | 7.87 (6.07) | **2.67 (14.52)** |
| 2 | MS | 10.53 | 12.2 4 (10.16) | **0.50 (0.82)** |
| 3 | MS | **29.16** | 9.81 (7.88) | 1.60 (7.76) |
| 4 | MS | 10.00 | 9.18 (7.29) | **4.61 (26.76)** |
| 5 | Healthy controls | 9.73 | **147.22 (136.53)** | 1.74 (8.65) |
| 6 | Healthy controls | **18.32** | 5.85 (4.18) | 1.21 (5.30) |
| 7 | Healthy controls | 14.49 | 16.54 (14.19) | **5.20 (30.48**) |
| 8 | Healthy controls | **11.66** | 4.56 (2.97) | 0.92 (3.47) |
| 9 | Healthy controls | **4.16** | 11.34 (9.32) | 2.06 (10.67) |
| 10 | Healthy controls | 5.27 | **39.27 (35.47)** | 1.19 (5.18) |
| 11 | High to low | 1.74 | **11.92 (9.86)** | 2.14 (11.17) |
| 12 | High to low | **1.40** | 6.60 (4.88) | 1.11 (4.67) |
| 13 | High to low | 6.29 | **140.67 (130.40)** | 1.60 (7.76) |
| 14 | High to low | 149.15 | 407.85 (380.55) | **0.59 (1.39)** |

*Converted values are shown in brackets; bold font indicates subjective assessment of outlier plattform; red background color indicates the outlier sample >4SD; RRMS = relapsing remitting multiple sclerosis; SD = standard deviation.

**Supplementary Table 2:** Comparison of the Area under the Curve (AUC) in ROC analysis between platforms, separate analysis of converted concentrations, and Z-scores. Significant (p<0.05) pairwise comparisons are shown in green.

| **Comparison** | **AUC 1** | **AUC 2** | **p value** | **Type** |
| --- | --- | --- | --- | --- |
| NF-Light Adv V2 (Plus) (Raw) vs NF-Light Adv V2 (Plus) (Z) | 0.691 | 0.719 | 0.18200 | Raw vs Z-Score |
| Elecsys NfL (Raw) vs Elecsys NfL (Z) | 0.754 | 0.781 | 0.22600 |
| Lumipulse G NfL (Raw) vs Lumipulse G NfL (Z) | 0.709 | 0.731 | 0.32700 |
| NF-Light Adv V2 (Plus) vs Elecsys NfL | 0.691 | 0.754 | 0.00858 | Concentrations |
| NF-Light Adv V2 (Plus) vs Lumipulse G NfL | 0.691 | 0.709 | 0.30500 |
| Elecsys NfL vs Lumipulse G NfL | 0.754 | 0.709 | 0.03880 |
| NF-Light Adv V2 (Plus) Z scores vs Elecsys NfL | 0.719 | 0.781 | 0.02130 | Z score |
| NF-Light Adv V2 (Plus) Z scores vs Lumipulse NfL | 0.719 | 0.731 | 0.51000 |
| Elecsys NfL Z Scores vs Lumipulse NfL | 0.781 | 0.731 | 0.02700 |


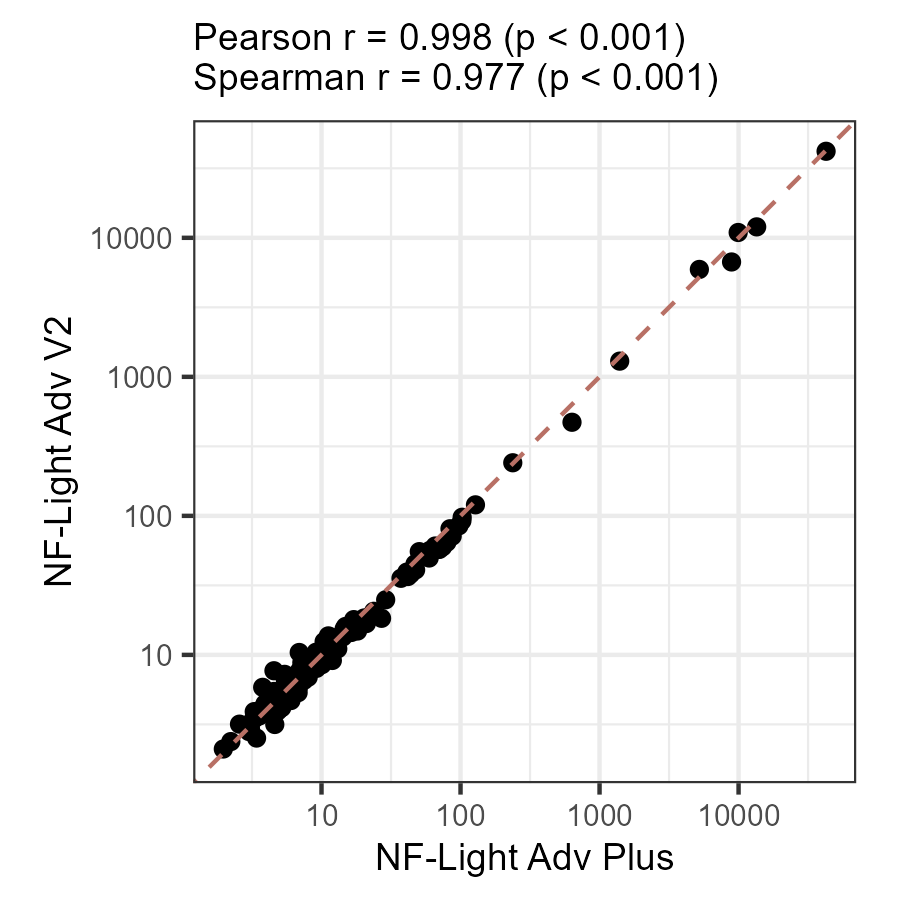


**Supplementary Figure 1:** Comparison between NF-light Advantage Adv V2 and NF-light Advantage Adv Plus assays on HD-X analyzer, Quanterix (Passing Bablok Regression: NF-Light Adv V2 = 0.919 * NF-Light Adv Plus+ 0.461, CI Slope: [0.88-0.95], CI Intercept: [0.28-0.85], N=159, results in pg/ml).


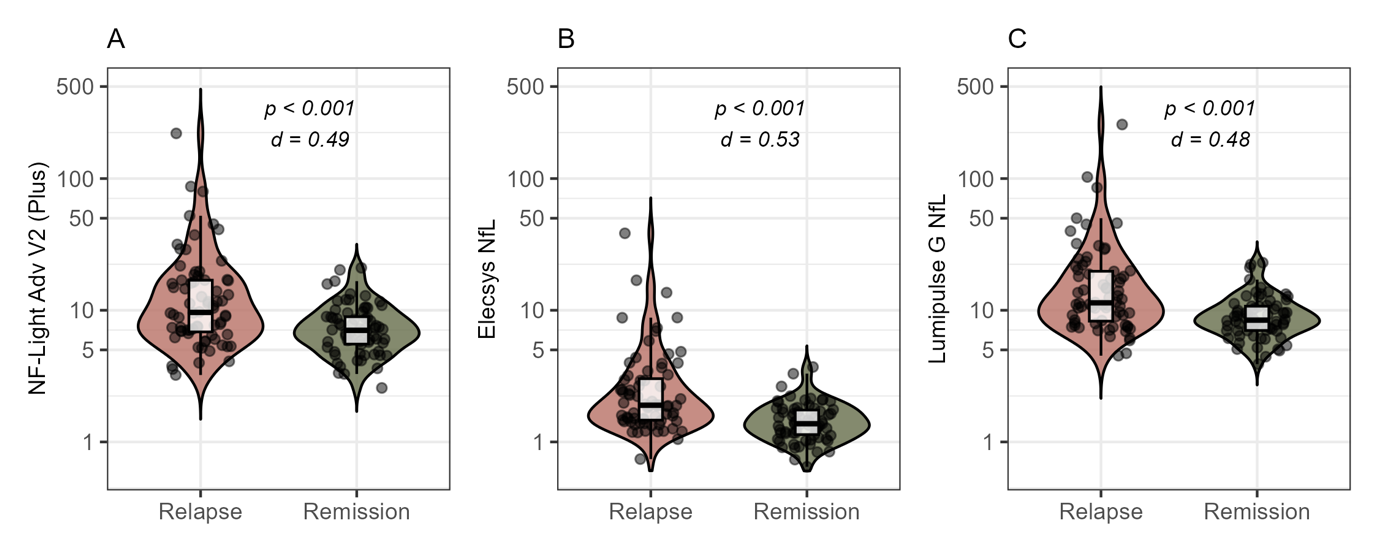


**Supplementary Figure 2:** **Analytical performance of non-converted absolute sNFL values on all platforms to discriminate MS patients with relapse and remission.** A) sNfL values in relapse and remission measured with NF-light Advantage (Adv) V2 (Plus), Quanterix; B) sNfL values in relapse and remission measured with Elecsys NfL, Roche Diagnostics; C) sNfL values in relapse and remission measured with Lumipulse G NfL blood, FujiRebio.


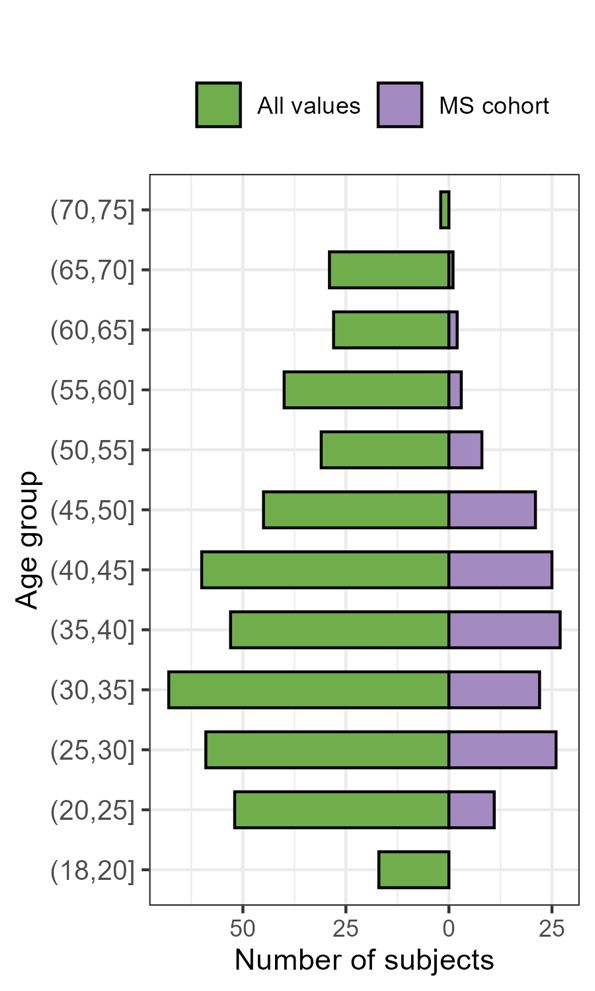


**Supplementary Figure 3: Age distribution in the study**. MS= multiple sclerosis.
